# Supplementary material for: WT1-AS/IGF2BP2 Axis Is a Potential Diagnostic and Prognostic Biomarker for Lung Adenocarcinoma According to ceRNA Network Comprehensive Analysis Combined with Experiments
Source: MDPI journal article supplement (doi:10.3390/cells11010025), 2021-12-23
Supplement: s1 [file s1]

## Supplementary Material

**Table S1.** IHC of c-Myc in Human Protein Atlas database.

| No. | Gene  | Tissue type    | ID   | Age | Gender | staining |
|-----|-------|----------------|------|-----|--------|----------|
| 1   | c-Myc | Normal         | 705  | 61  | Female | Low      |
| 2   | c-Myc | Normal         | 218  | 73  | Male   | Low      |
| 3   | c-Myc | Adenocarcinoma | 1327 | 64  | Male   | Medium   |
| 4   | c-Myc | Adenocarcinoma | 1249 | 44  | Female | High     |

**Table S2.** Univariate analysis of overall survival in LUAD patients stratified based on clinical characteristics.

| Factor                       | Variable | N   | WT1-AS                 | P      | miR-200a-3p            | P      | IGF2BP2                | P      | Overall survival |                  |                               |
|------------------------------|----------|-----|------------------------|--------|------------------------|--------|------------------------|--------|------------------|------------------|-------------------------------|
|                              |          |     | Expression<br>(Median) |        | Expression<br>(Median) |        | Expression<br>(Median) |        | Months<br>(mean) | 95% CI<br>(mean) | P-value<br>(log-rank<br>test) |
| Age                          | >60      | 333 | 4                      | 0.5059 | 3021                   | 0.6062 | 830                    | 0.5306 | 32.127           | 25.26–30.53      | 0.3639                        |
|                              | ≤60      | 154 | 3                      |        | 3971                   |        | 895                    |        | 27.893           | 26.09–38.17      |                               |
| Gender                       | Male     | 232 | 5                      | 0.4954 | 3309.5                 | 0.4809 | 985.5                  | 0.1820 | 30.523           | 26.19–34.87      | 0.9138                        |
|                              | Female   | 265 | 4                      |        | 3498                   |        | 801                    |        | 29.86            | 26.63–33.09      |                               |
| Tumor size<br>(T)            | >3       | 328 | 5                      | 0.0449 | 3462.5                 | 0.8975 | 975.5                  | 0.0434 | 30.907           | 26.66–33.14      | 0.0048                        |
|                              | ≤3       | 166 | 3                      |        | 3317                   |        | 735                    |        | 29.9             | 25.6–35.6        |                               |
| Lymph-node<br>metastasis (N) | Negative | 320 | 4                      | 0.3920 | 3567                   | 0.0474 | 869                    | 0.8683 | 32.543           | 28.98–36.1       | <0.0001                       |
|                              | Positive | 165 | 4                      |        | 2991                   |        | 890                    |        | 25.97            | 22.08–29.86      |                               |
| Distant<br>metastasis<br>(M) | Negative | 330 | 4.5                    | 0.1483 | 3259                   | 0.7043 | 796                    | 0.8538 | 31.813           | 28.49–35.13      | 0.0023                        |
|                              | Positive | 23  | 2                      |        | 2991                   |        | 978                    |        | 24.207           | 16.01–32.4       |                               |
| TNM stage                    | I–II     | 386 | 5                      | 0.6111 | 3700.5                 | 0.0026 | 796                    | 0.0464 | 31.85            | 28.69–35         | <0.0001                       |
|                              | III–IV   | 104 | 2.5                    |        | 2493                   |        | 1067.5                 |        | 23.083           | 18.94–27.23      |                               |

**Table S3.** Univariate and multivariate analysis (Cox regression model) of WT1-AS and IGF2BP2 in LUAD patients.

| Factor                           | Univariate Cox |             |                            | Munivariate Cox |             |                            |
|----------------------------------|----------------|-------------|----------------------------|-----------------|-------------|----------------------------|
|                                  | HR             | 95% CI      | P value<br>(Log-rank test) | HR              | 95% CI      | P value<br>(Log-rank test) |
| Age                              | 0.952          | 0.729–1.245 | 0.722                      |                 |             |                            |
| Gender                           | 0.972          | 0.726–1.303 | 0.851                      |                 |             |                            |
| TNM stage                        | 1.758          | 1.364–2.266 | <0.0001                    | 1.341           | 1.009–1.784 | 0.043                      |
| Tumor size (T)                   | 1.659          | 1.178–2.336 | 0.004                      | 1.456           | 1.029–2.059 | 0.034                      |
| Lymph node metastasis<br>(N)     | 2.035          | 1.598–2.592 | <0.0001                    | 1.818           | 1.393–2.374 | <0.0001                    |
| Distant metastasis (M)           | 0.951          | 0.801–1.129 | 0.564                      |                 |             |                            |
| WT1-AS expression<br>(high/low)  | 1.229          | 0.917–1.647 | 0.168                      |                 |             |                            |
| IGF2BP2 expression<br>(high/low) | 1.262          | 0.942–1.692 | 0.119                      |                 |             |                            |

**Table S4.** Correlation analysis between IGF2BP2 and biomarkers of immune cells using TIMER.

| Description         | Gene markers    | LUAD   |                        |
|---------------------|-----------------|--------|------------------------|
|                     |                 | Cor    | p-value                |
| CD8+ T cell         | CD8A            | 0.172  | $8.56 \times 10^{-5}$  |
|                     | CD8B            | 0.156  | $3.77 \times 10^{-4}$  |
| T cell (general)    | CD3D            | 0.114  | $9.66 \times 10^{-3}$  |
|                     | CD3E            | 0.12   | $6.38 \times 10^{-3}$  |
|                     | CD2             | 0.1    | $2.35 \times 10^{-5}$  |
| B cell              | CD19            | 0.021  | $6.36 \times 10^{-1}$  |
|                     | CD79A           | 0.02   | $6.54 \times 10^{-1}$  |
| Monocyte            | CD86            | 0.161  | $2.45 \times 10^{-4}$  |
|                     | CD115 (CSF1R)   | 0.17   | $1.04 \times 10^{-4}$  |
| TAM                 | CCL2            | 0.163  | $2.01 \times 10^{-4}$  |
|                     | CD68            | 0.177  | $5.49 \times 10^{-5}$  |
|                     | IL10            | 0.123  | $5.13 \times 10^{-3}$  |
| M1 Macrophage       | INOS (NOS2)     | 0.153  | $5.12 \times 10^{-4}$  |
|                     | IRF5            | 0.212  | $1.18 \times 10^{-6}$  |
|                     | COX2 (PTGS2)    | 0.099  | $2.49 \times 10^{-5}$  |
| M2 Macrophage       | CD163           | 0.197  | $6.81 \times 10^{-6}$  |
|                     | VSIG4           | 0.106  | $1.63 \times 10^{-2}$  |
|                     | MS4A4A          | 0.093  | $3.39 \times 10^{-2}$  |
| Neutrophils         | CD66b (CEACAM8) | -0.122 | $5.57 \times 10^{-03}$ |
|                     | CD11b (ITGAM)   | 0.175  | $6.30 \times 10^{-05}$ |
|                     | CCR7            | 0.071  | $1.08 \times 10^{-01}$ |
| Natural killer cell | KIR2DL1         | 0.051  | $2.46 \times 10^{-01}$ |
|                     | KIR2DL3         | 0.147  | $8.21 \times 10^{-04}$ |
|                     | KIR2DL4         | 0.239  | $4.09 \times 10^{-08}$ |
|                     | KIR3DL1         | 0.082  | $6.24 \times 10^{-02}$ |
|                     | KIR3DL2         | 0.104  | $1.78 \times 10^{-02}$ |
|                     | KIR3DL3         | 0.108  | $1.44 \times 10^{-02}$ |
|                     | KIR2DS4         | 0.132  | $2.59 \times 10^{-03}$ |
| Dendritic cell      | HLA-DPB1        | -0.101 | $2.25 \times 10^{-02}$ |

|                   |                      |        |                        |
|-------------------|----------------------|--------|------------------------|
|                   | HLA-DQB1             | -0.075 | $9.09 \times 10^{-02}$ |
|                   | HLA-DRA              | -0.079 | $7.46 \times 10^{-02}$ |
|                   | HLA-DPA1             | -0.056 | $2.09 \times 10^{-01}$ |
|                   | BDCA-1 (CD1C)        | -0.151 | $5.82 \times 10^{-04}$ |
|                   | BDCA-4 (NRP1)        | 0.161  | $2.42 \times 10^{-04}$ |
|                   | CD11c (ITGAX)        | 0.158  | $3.09 \times 10^{-04}$ |
| Th1               | T-bet (TBX21)        | 0.205  | $2.84 \times 10^{-06}$ |
|                   | STAT4                | 0.044  | $3.23 \times 10^{-01}$ |
|                   | STAT1                | 0.373  | $2.95 \times 10^{-18}$ |
|                   | TNF- $\gamma$ (IFNG) | 0.183  | $2.89 \times 10^{-05}$ |
|                   | TNF- $\alpha$ (TNF)  | 0.114  | $9.62 \times 10^{-03}$ |
| Th2               | GATA3                | 0.23   | $1.25 \times 10^{-07}$ |
|                   | STAT6                | 0.012  | $7.88 \times 10^{-01}$ |
|                   | STAT5A               | 0.245  | $1.86 \times 10^{-08}$ |
|                   | IL13                 | 0.04   | $3.71 \times 10^{-01}$ |
| Tfh               | BCL6                 | 0.079  | $7.28 \times 10^{-02}$ |
|                   | IL21                 | 0.143  | $1.10 \times 10^{-03}$ |
| Th17              | STAT3                | 0.065  | $1.39 \times 10^{-01}$ |
|                   | IL17A                | 0.045  | $3.09 \times 10^{-01}$ |
| Treg              | FOXP3                | 0.196  | $7.73 \times 10^{-06}$ |
|                   | CCR8                 | 0.186  | $2.12 \times 10^{-05}$ |
|                   | STAT5B               | 0.22   | $4.34 \times 10^{-07}$ |
|                   | TGF $\beta$ (TGFB1)  | 0.186  | $2.07 \times 10^{-05}$ |
| T cell exhaustion | PD-1 (PDCD1)         | 0.259  | $1.50 \times 10^{-07}$ |
|                   | CTLA4                | 0.184  | $2.73 \times 10^{-05}$ |
|                   | LAG3                 | 0.217  | $4.94 \times 10^{-08}$ |
|                   | TIM-3 (HAVCR2)       | 0.159  | $2.86 \times 10^{-04}$ |
|                   | GZMB                 | 0.278  | $1.43 \times 10^{-10}$ |

---

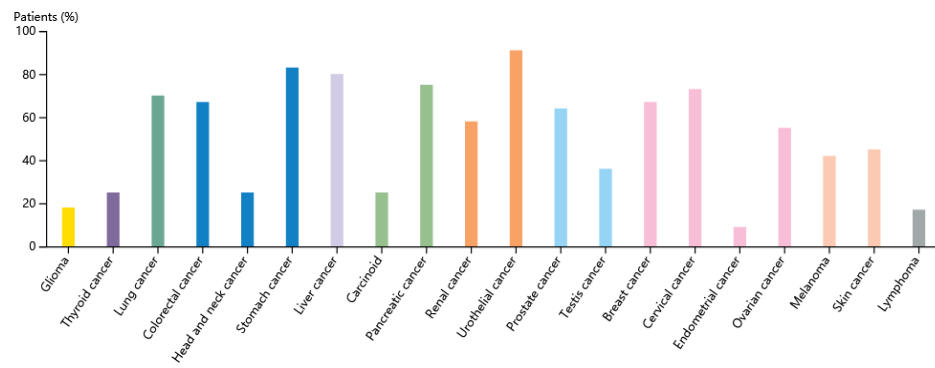

**Figure S1.** Expression distribution expression of c-Myc in various cancer tissues.

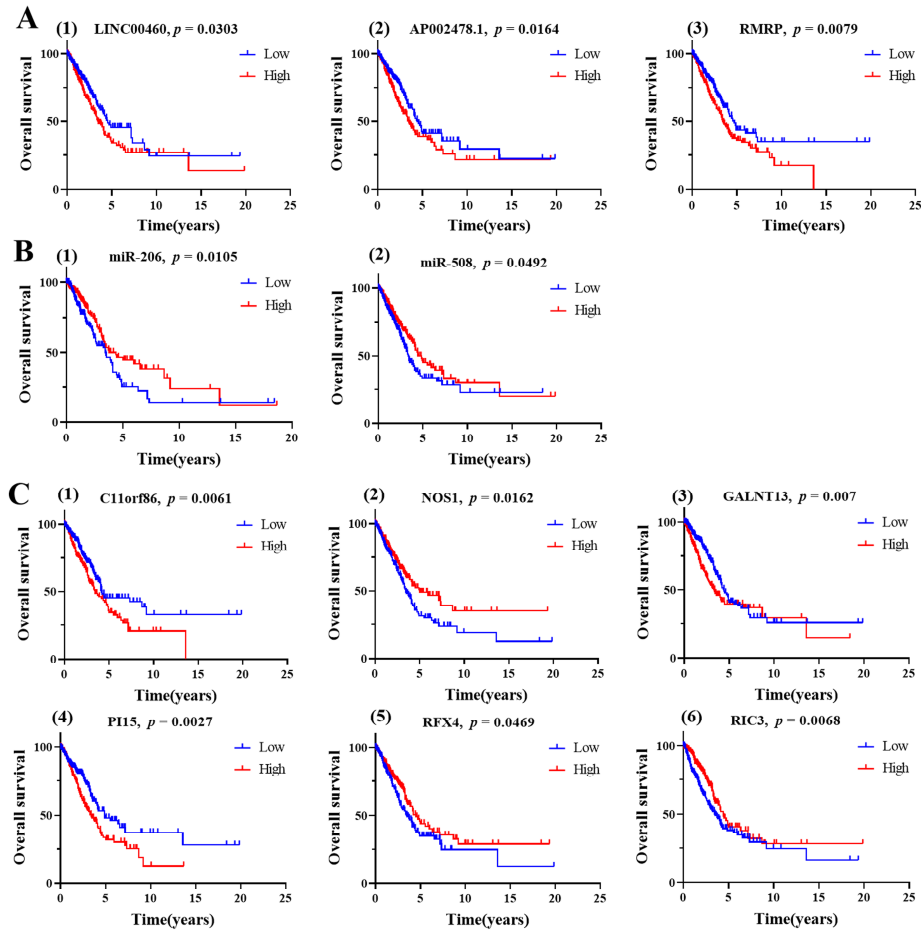

**Figure S2.** Correlation analysis of differentially expressed RNAs in ceRNA network with overall survival of LUAD patients. The high-expression and low-expression value of (A) 4 lncRNAs, (B) 3 miRNAs and (C) 8 mRNAs were compared by Kaplan–Meier survival curve for LUAD patient cohort.  $P < 0.05$  was deemed as statistically significant.

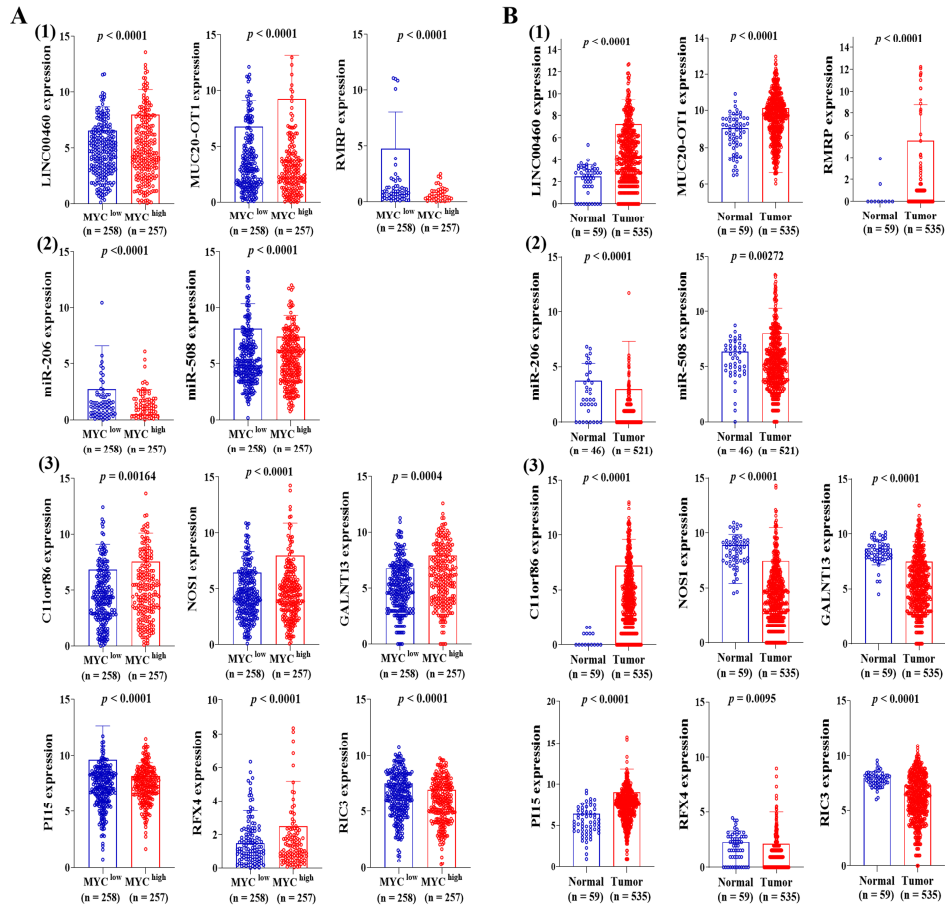

**Figure S3.** The distribution of 15 RNAs expression value from the ceRNA network in the TCGA LUAD dataset. The expression pattern of 4 lncRNAs, 3 miRNAs and 8 mRNAs in LUAD samples with c-Myc<sup>high</sup> and c-Myc<sup>low</sup> groups (**A**) as well as in LUAD and adjacent-normal lung tissues (**B**). The RNAs expression value was logarithmized with log2.  $P < 0.05$  was deemed as statistically significant.

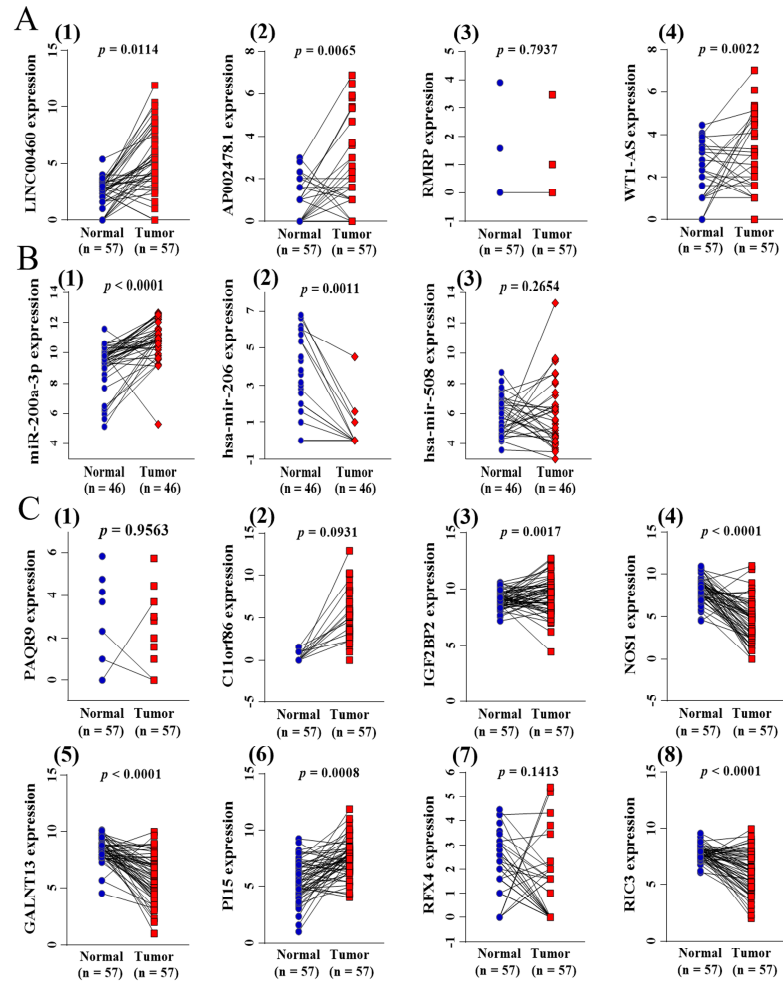

**Figure S4.** The distribution of 15 RNAs expression value in paired LUAD tissues.

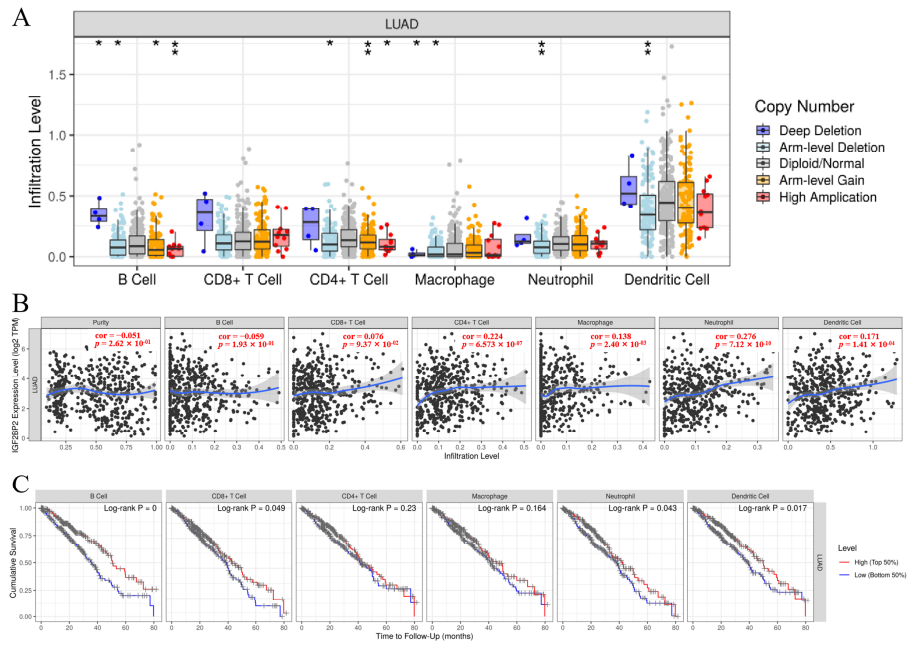

**Figure S5.** Correlation analysis of IGF2BP2 expression levels with immune infiltration in lung adenocarcinoma. (A) Correlation between IGF2BP2 gene copy numbers and the level of infiltration of six immune cells in LUAD. (B) Correlation between IGF2BP2 expression and the level of immune infiltration in LUAD. (C) Correlation analysis of immune infiltration and OS of LUAD. \*  $P < 0.05$ ; \*\*  $P < 0.01$ .  $P < 0.05$  was deemed as statistically significant.
